# Supplementary material for: RNA structure determination by solid-state NMR spectroscopy
Source: PubMed Central journal article supplement (PMC4432599; doi:10.1038/ncomms8024), 2015-05-11
Supplement: ncomms8024-s1.pdf [file ncomms8024-s1.pdf]

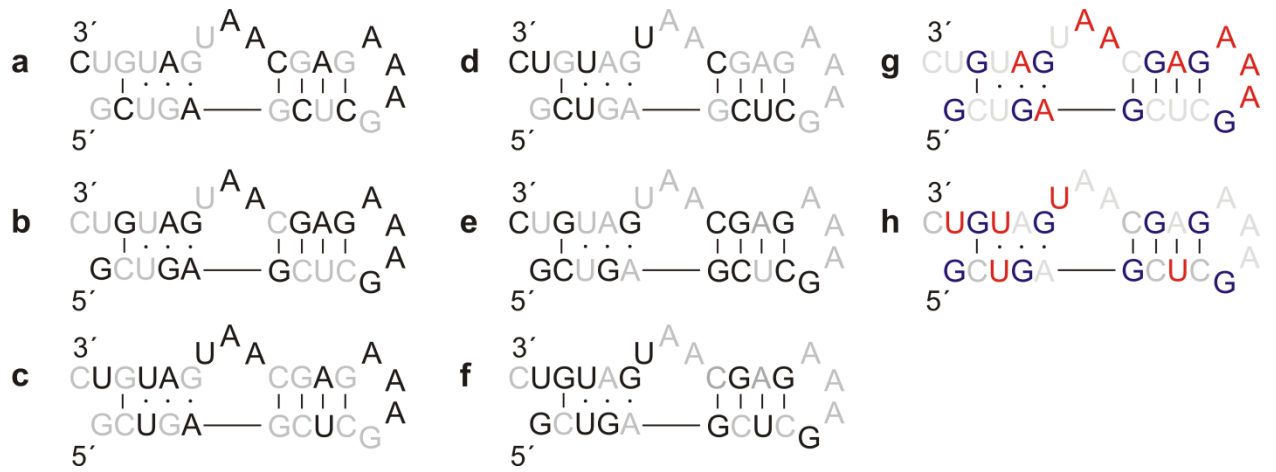

**Supplementary Figure 1 | Overview of samples used for the structure determination of the *Pf* 26mer Box C/D RNA. a, A,C<sup>lab</sup>-RNA, b, A,G<sup>lab</sup>-RNA, c, A,U<sup>lab</sup>-RNA, d, C,U<sup>lab</sup>-RNA, e, G,C<sup>lab</sup>-RNA, f, G,U<sup>lab</sup>-RNA, g, (G-<sup>13</sup>C/A-<sup>15</sup>N)<sup>lab</sup>-RNA, h, (G-<sup>13</sup>C/U-<sup>15</sup>N)<sup>lab</sup>-RNA.**

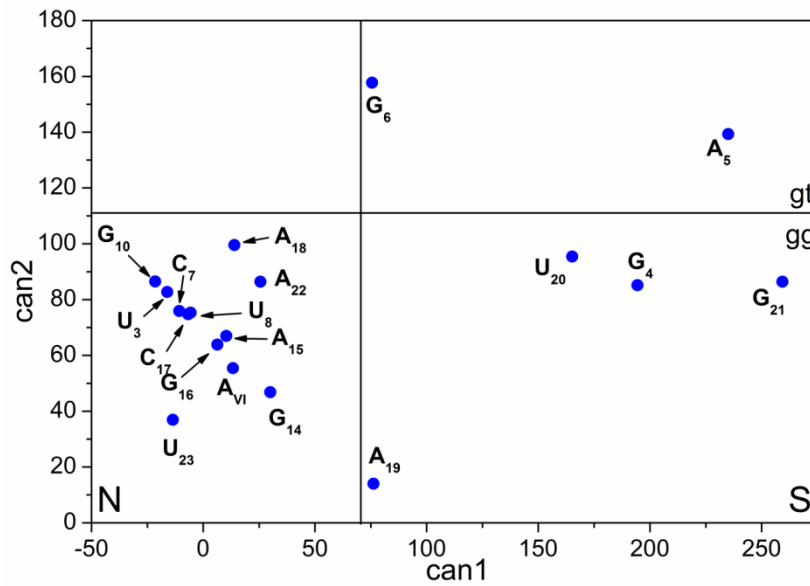

**Supplementary Figure 2 | Canonical coordinates constructed from the ribose chemical shifts.** S (south) and N (north) indicate the C2'-endo and the C3'-endo conformations of the ribose, respectively; gg and gt indicate the gauche/gauche and the gauche/trans conformations of the  $\gamma$  dihedral angle of the RNA backbone<sup>1</sup>.

$$can1 = -14.7\delta_{C1'} + 22.1\delta_{C2'} + 13.3\delta_{C3'} + 6.5\delta_{C4'} - 2.9\delta_{C5'} - 1595$$

$$can2 = 9.8\delta_{C1'} + 16.5\delta_{C2'} - 0.5\delta_{C3'} - 1.7\delta_{C4'} + 13.5\delta_{C5'} - 2781.$$

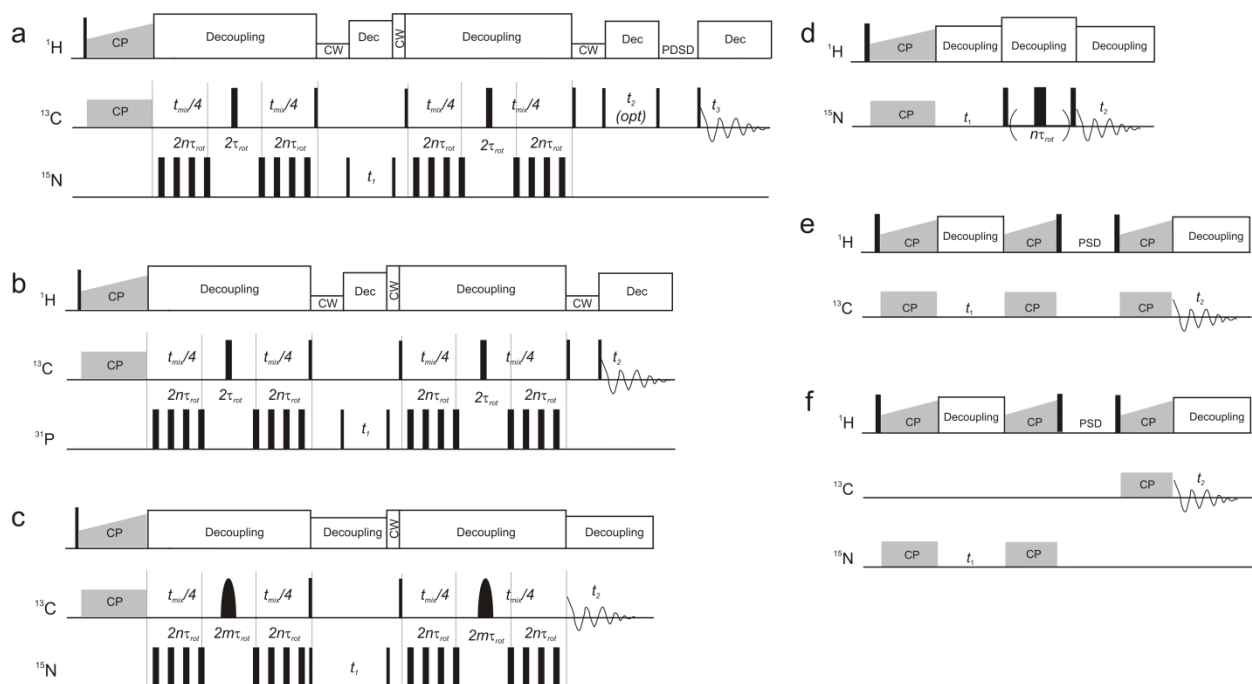

**Supplementary Figure 3 | Pulse sequences for the experiments used in this study.** Narrow and wide solid rectangles represent  $\pi/2$  and  $\pi$  pulses, respectively. In all experiments the  $^1\text{H}$   $\pi/2$  pulse width was 2.7-3.0  $\mu\text{s}$ , while the  $^{13}\text{C}$  and  $^{15}\text{N}$   $\pi/2$  pulse widths were both 6  $\mu\text{s}$ . **a**,  $^{13}\text{C}$ ,  $^{15}\text{N}$ -TEDOR- $^{13}\text{C}$ ,  $^{13}\text{C}$ -PDSD experiment. The TEDOR mixing time,  $t_{\text{mix}}$ , was 1.5-2 ms, the PDSD mixing time was 200-700 ms. **b**,  $^{13}\text{C}$ ,  $^{31}\text{P}$ -TEDOR<sup>2</sup> experiment. The  $^{31}\text{P}$   $\pi/2$  pulse width was 6  $\mu\text{s}$ ; the sensitivity optimized TEDOR mixing time was 3.2 ms. **c**,  $^{13}\text{C}$ -band-selective,  $^{15}\text{N}$ -TEDOR experiment<sup>2</sup>. The width of the band-selective  $^{13}\text{C}$  refocussing pulse was set to 8.5 rotor periods (531.25  $\mu\text{s}$ ), with the  $^{13}\text{C}$  carrier placed at 90 ppm. **d**,  $^{15}\text{N}$ ,  $^{15}\text{N}$ -RFDR experiment<sup>3</sup>. The RDRF mixing time was 20 ms. **e** and **f**, CHHC and NHHC experiments<sup>4,5</sup>. The PSD (Proton Spin Diffusion) mixing time was 100-200  $\mu\text{s}$ . CP, cross polarization; CW, continuous wave decoupling; Dec, decoupling;  $\tau_{\text{rot}}$ , rotor period.

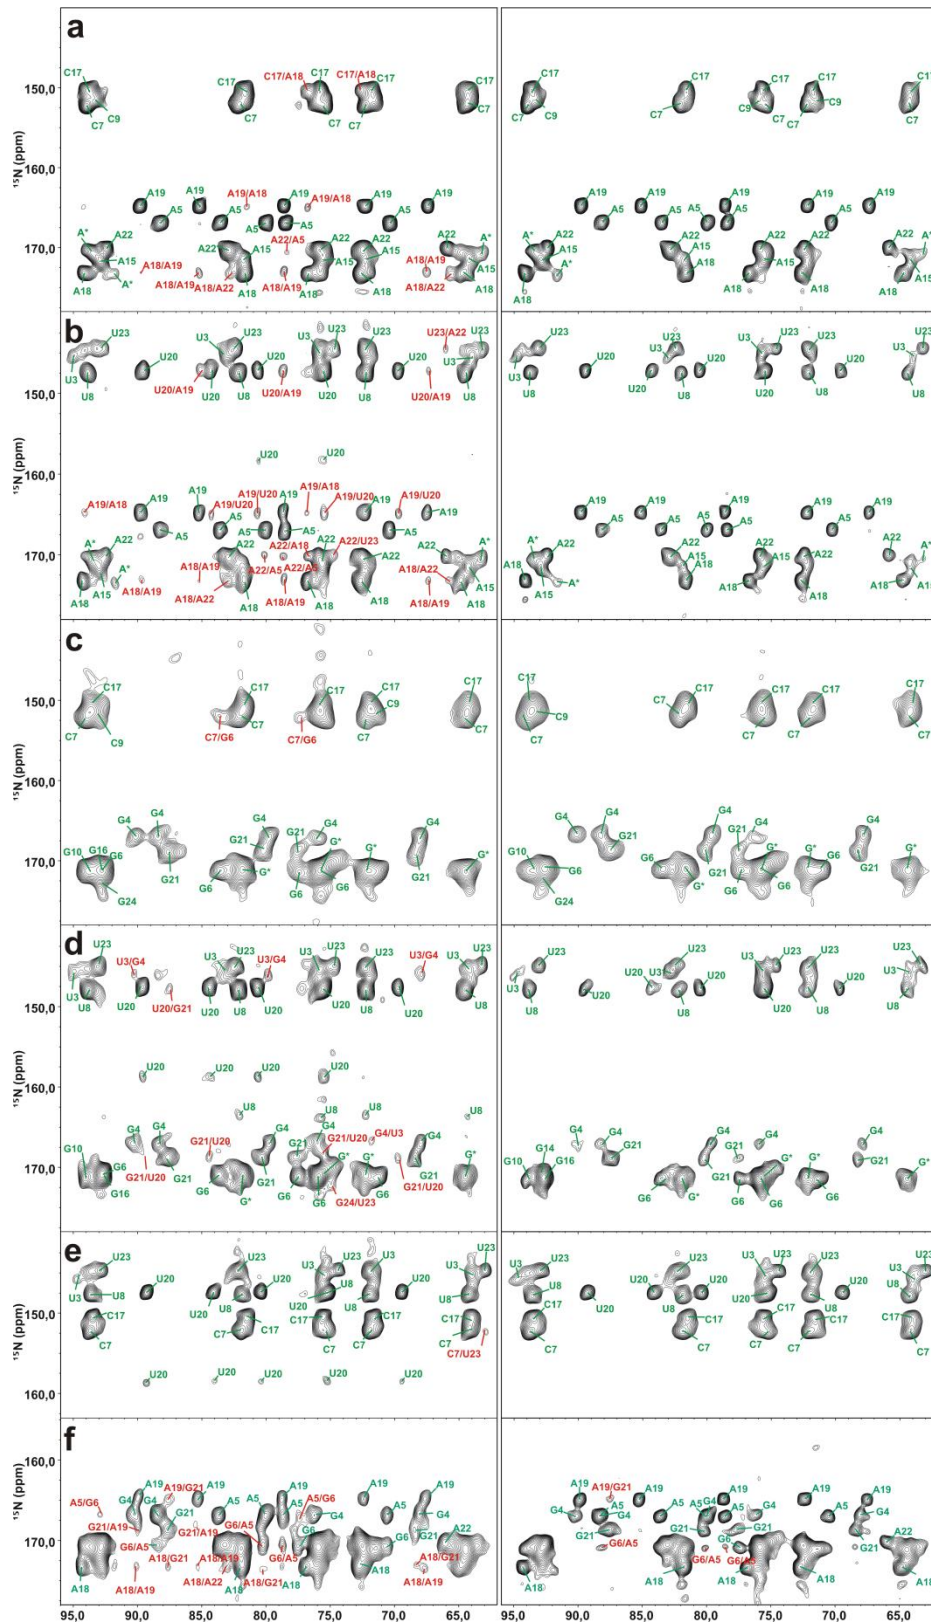

**Supplementary Figure 4 | Ribose regions of 2D  $^{13}\text{C},^{15}\text{N}$ -TEDOR- $^{13}\text{C},^{13}\text{C}$ -PDSB spectra. a, A,C<sup>lab</sup>-RNA, b, A,U<sup>lab</sup>-RNA, c, G,C<sup>lab</sup>-RNA, d, G,U<sup>lab</sup>-RNA, e, C,U<sup>lab</sup>-RNA and f, A,G<sup>lab</sup>-RNA at 700 ms (left) and 100 ms (right) PDSB mixing times. Intra- and inter-nucleotide correlations are indicated in green and red, respectively. Overlapped resonances of guanosines, cytidines and adenosines are labelled as G\*, C\* and A\*. Not assigned resonances in (f) represent overlaps of adenosines and guanosines. The total acquisition time was typically 2 days for 2D spectra at 100 ms mixing time and 4.5 days for 2D spectra at 700 ms mixing time.**

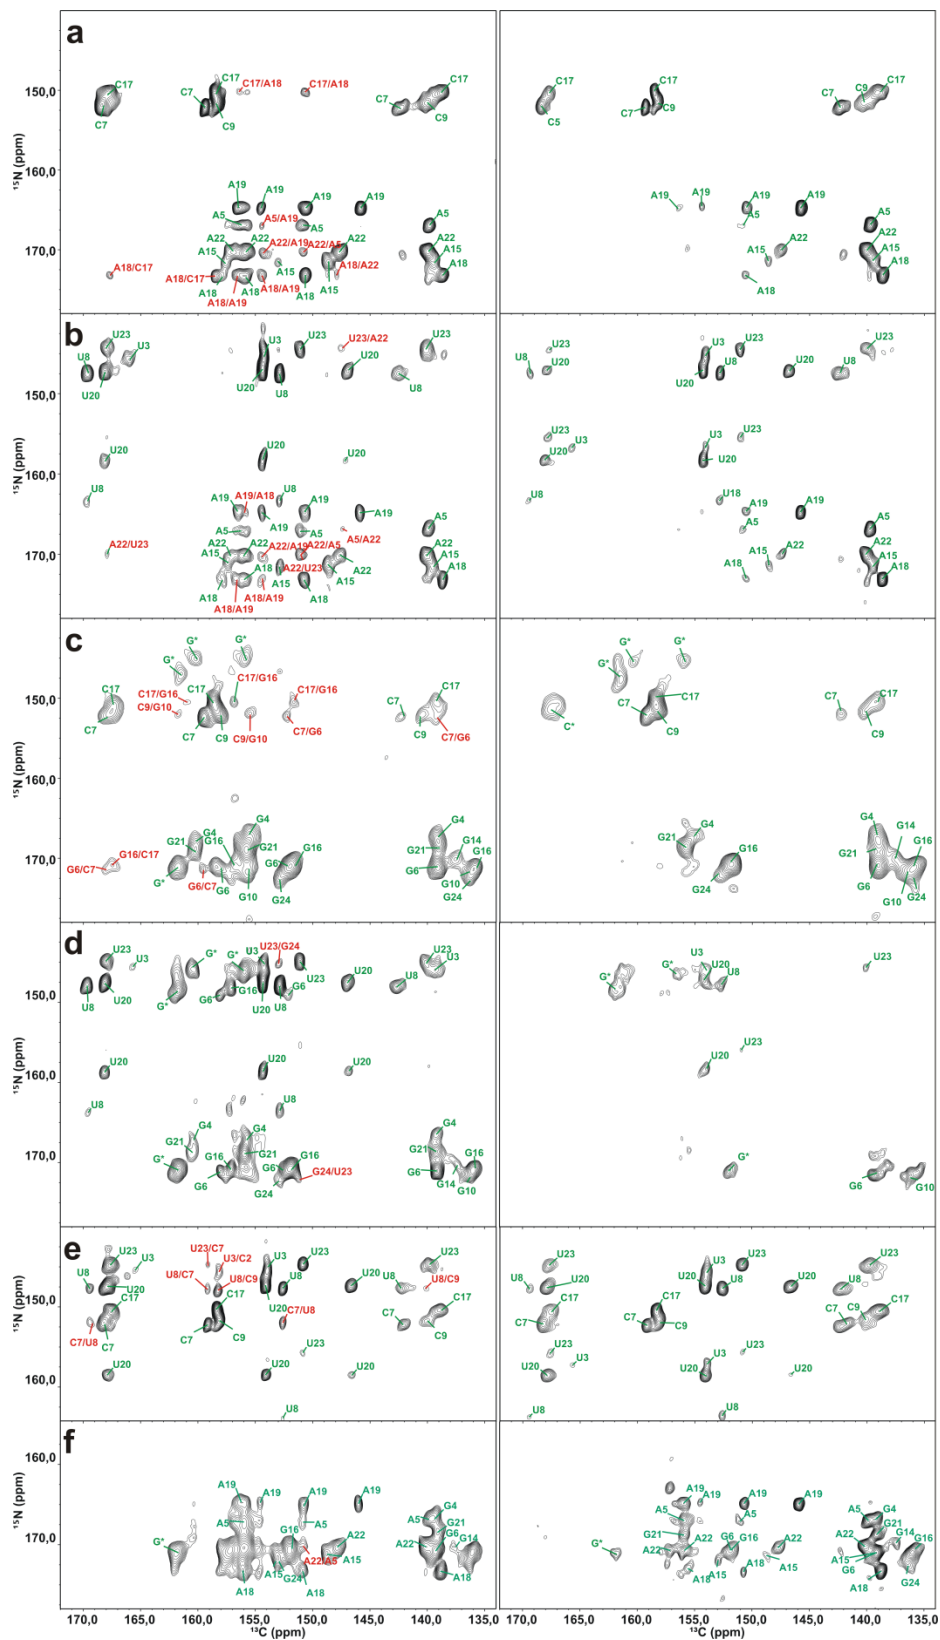

**Supplementary Figure 5 | Base regions of 2D  $^{13}\text{C}$ ,  $^{15}\text{N}$ -TEDOR- $^{13}\text{C}$ ,  $^{13}\text{C}$ -PDS spectra. a,  $\text{A,C}^{\text{lab}}$ -RNA, b,  $\text{A,U}^{\text{lab}}$ -RNA, c,  $\text{G,C}^{\text{lab}}$ -RNA, d,  $\text{G,U}^{\text{lab}}$ -RNA, e,  $\text{C,U}^{\text{lab}}$ -RNA and f,  $\text{A,G}^{\text{lab}}$ -RNA at 700 ms (left) and 100 ms (right) PDS mixing times. Intra- and inter-nucleotide correlations are indicated in green and red, respectively. Overlapped resonances of guanosines, cytidines and adenosines are labelled as G\*, C\* and A\*. Not assigned resonances in (f) represent overlaps of adenosines and guanosines.**

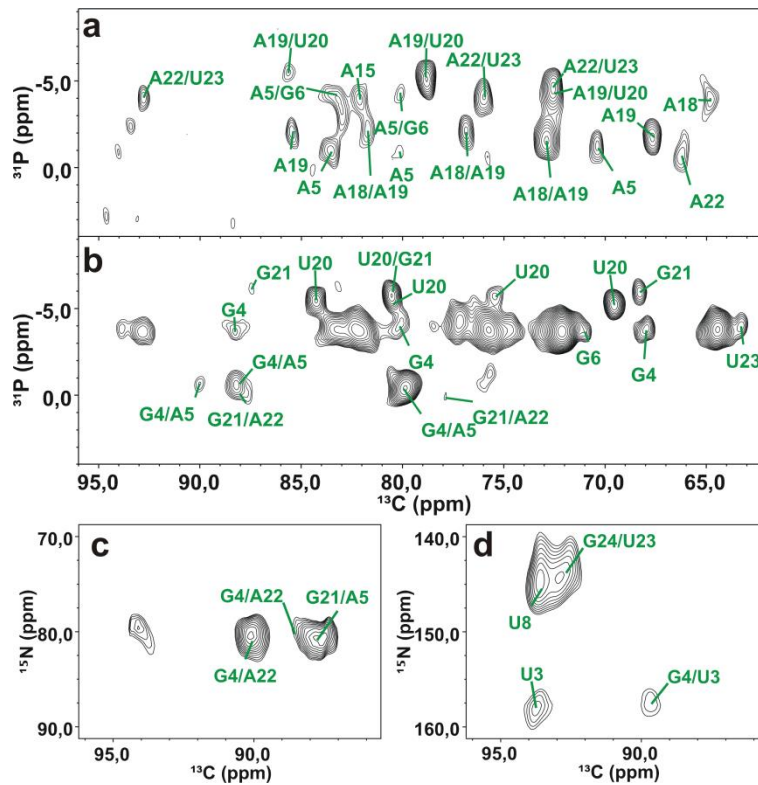

**Supplementary Figure 6 | 2D TEDOR spectra. a-b,**  $^{13}\text{C}$ ,  $^{31}\text{P}$ -TEDOR spectra. **a,**  $\text{A}^{\text{lab}}$ -RNA and **b,**  $\text{G,U}^{\text{lab}}$ -RNA; TEDOR mixing time, 3.2 ms. Non assigned resonances correspond to overlapped nucleotides in helical regions of the RNA. Total acquisition time was 4 days per spectrum. **c-d,**  $^{13}\text{C}$ -band-selective,  $^{15}\text{N}$ -TEDOR spectra. **c,**  $(\text{G-}^{13}\text{C}/\text{A-}^{15}\text{N})^{\text{lab}}$ -RNA and **d,**  $(\text{G-}^{13}\text{C}/\text{U-}^{15}\text{N})^{\text{lab}}$ -RNA (mixing time, 12 ms). The total acquisition time was 5 days per spectrum.

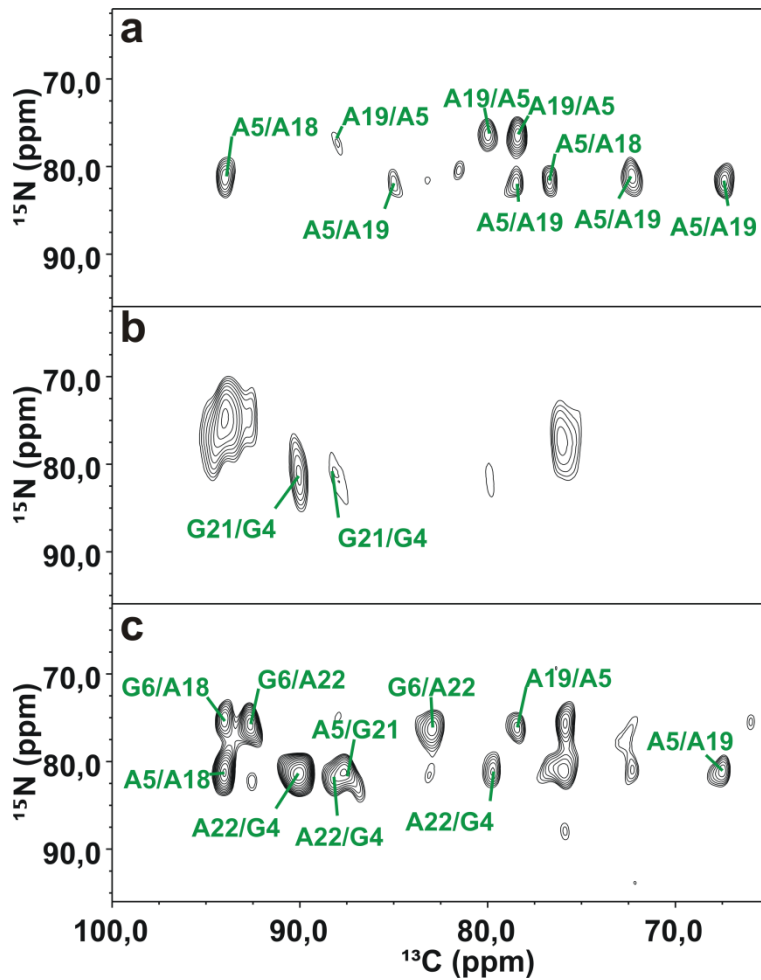

**Supplementary Figure 7 | NHC spectra with 200  $\mu\text{s}$  mixing time. a, A,C<sup>lab</sup>-RNA, b, G,U<sup>lab</sup>-RNA and c, A,G<sup>lab</sup>-RNA. Total acquisition time was 2 days per spectrum for (a) and (c) and 4 days for (b). Not assigned resonances represent non-resolved overlaps. The resolution of the  $^{15}\text{N}$  dimension for the spectrum in (b) was 2.4 times worse than in (a,c).**



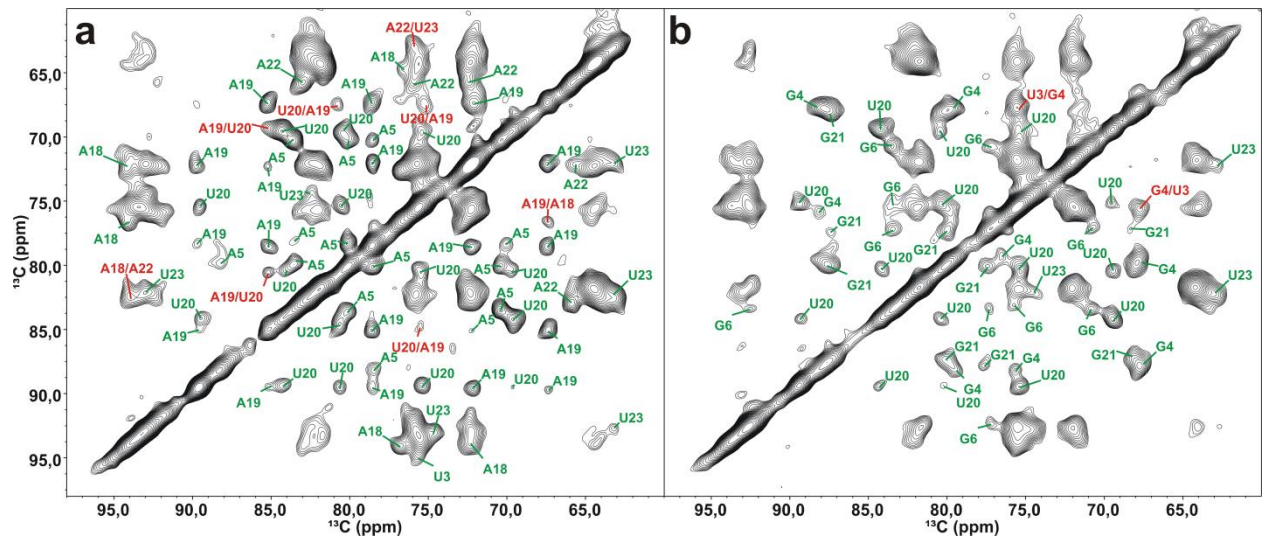

**Supplementary Figure 8 | Ribose regions of CHHC spectra with 200  $\mu$ s mixing time. a, A,U<sup>lab</sup>-RNA, and b, G,U<sup>lab</sup>-RNA. Intra- and inter-nucleotide correlations are indicated in green and red, respectively. Non-assigned resonances correspond to overlapped peaks. The total acquisition time was 2 days per spectrum.**



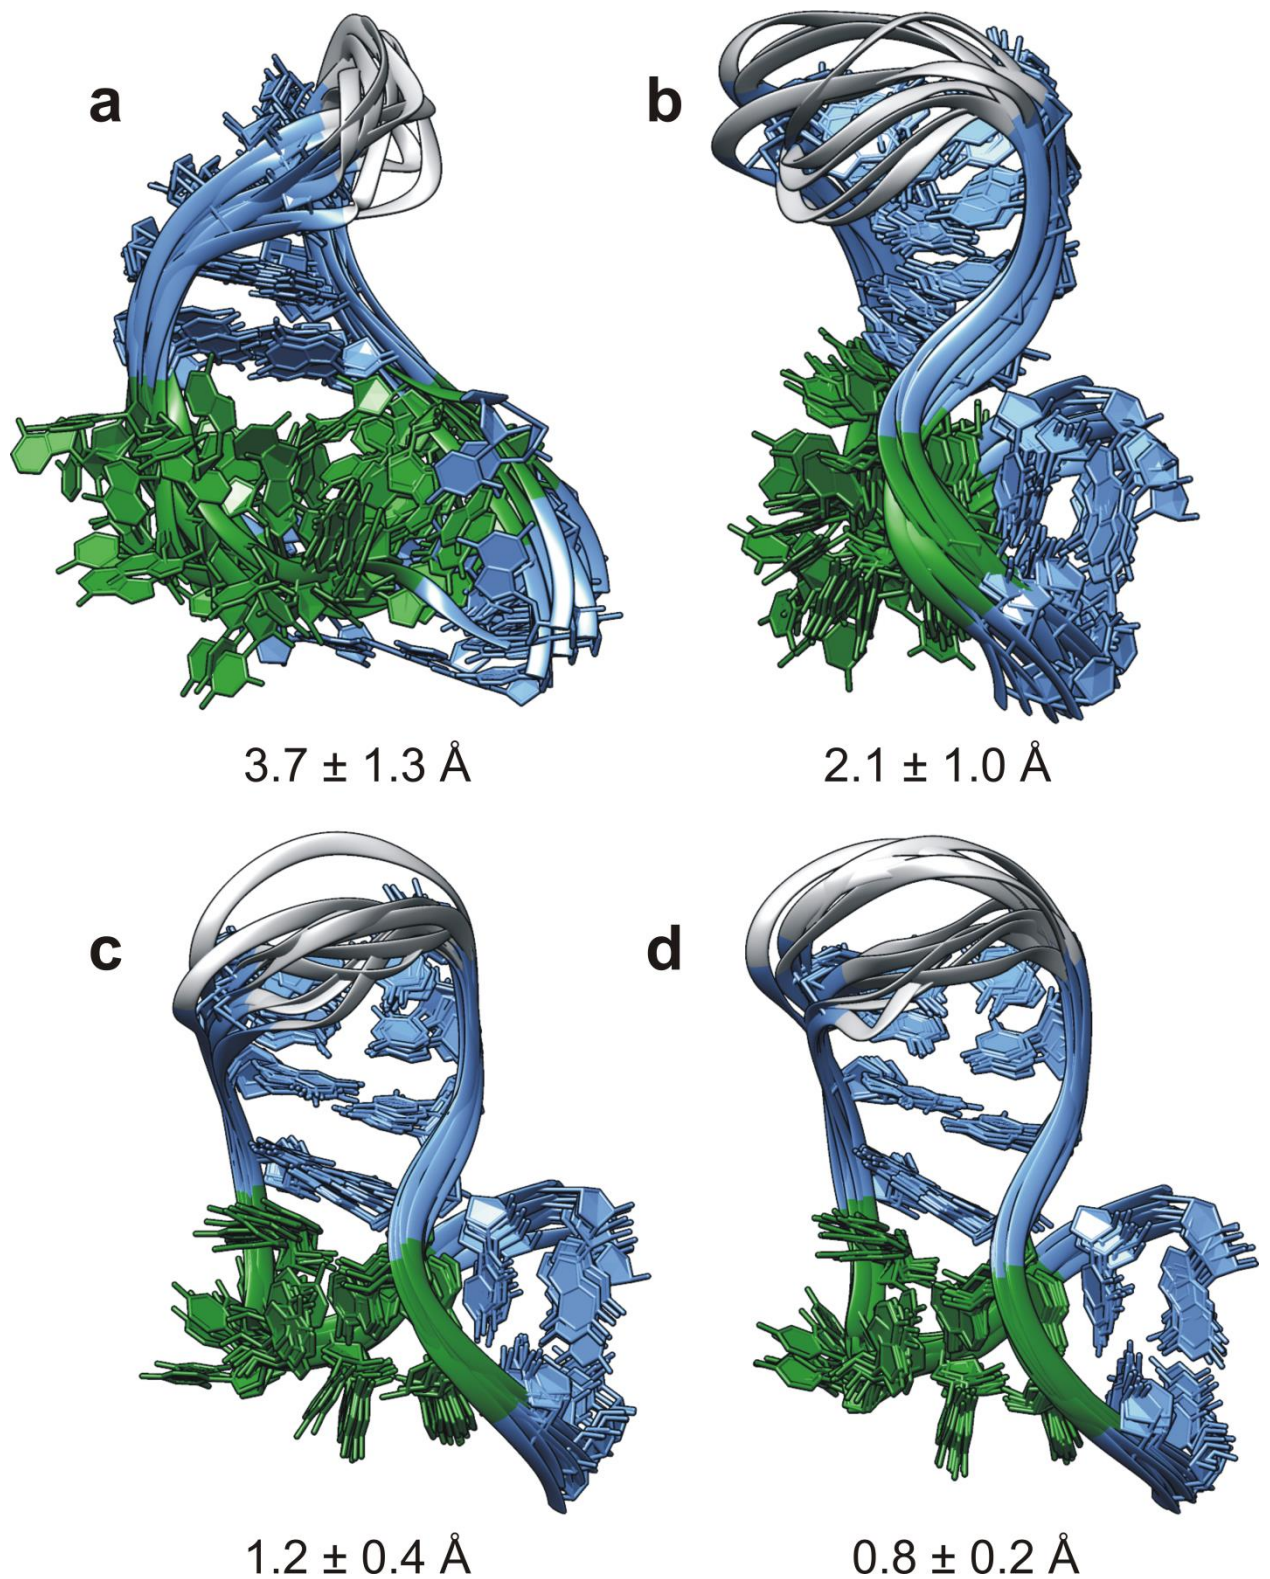

**Supplementary Figure 9 | Impact of different restraint classes on the precision of the ssNMR structure.** **a**, Dihedral angles restraints and base-pairs restraints only; **b**, as in (a) with the addition of restraints derived from the  $^{13}\text{C}, ^{15}\text{N}$ -TEDOR- $^{13}\text{C}, ^{13}\text{C}$ -PDSO spectra; **c**, as in (b) with the addition of restraints derived from the CHHC and NHHC spectra; **d**, all restraints. Terminal nucleotides 1 and 25-26 are not shown. Helical regions, light blue; k-turn, green; loop, gray. The precision of the first 20 structures is indicated in each panel as the average backbone r.m.s.d. to the mean structure for residues 2-9 and 14-24, excluding the disordered loop and terminal nucleotides.

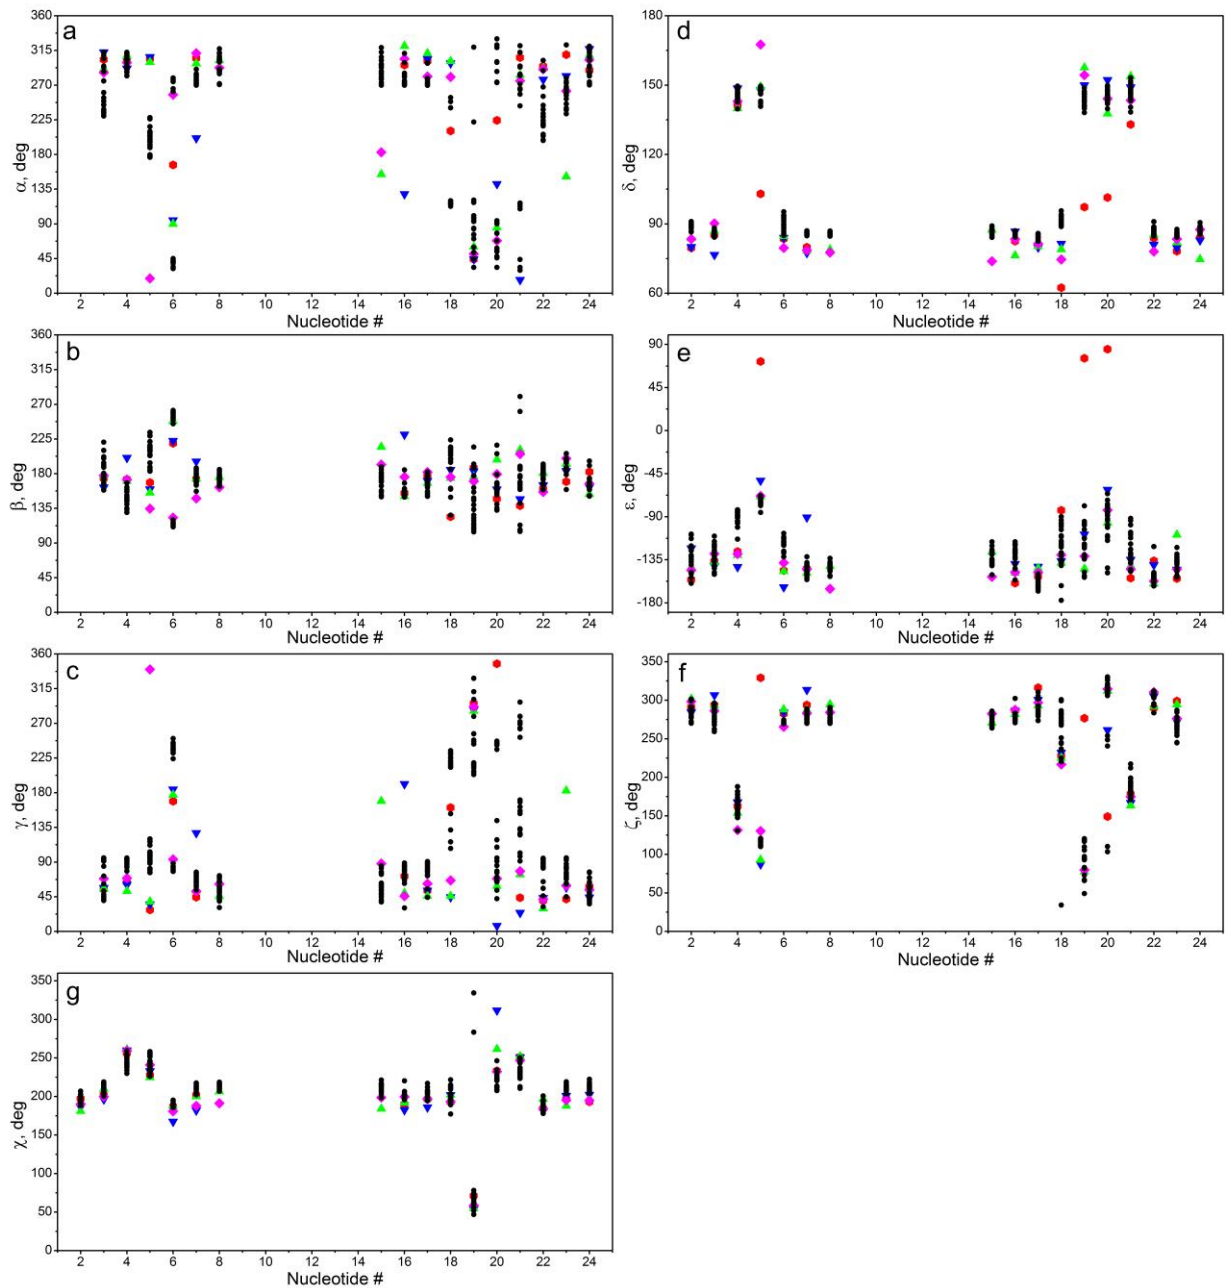

**Supplementary Figure 10 | Comparison of ribose dihedrals angles for the 20 lowest energy ssNMR structures (black dots) and orthologous X-ray structures. 1RLG<sup>6</sup> (red hexagons), 3NMU<sup>7</sup> (blue triangles), 4BW0<sup>8</sup> (green triangles), 3PLA<sup>9</sup> (magenta diamonds). a,  $\alpha$ ; b,  $\beta$ ; c,  $\gamma$ ; d,  $\delta$ ; e,  $\epsilon$ ; f,  $\zeta$ ; g,  $\chi$ .**

**Supplementary Table 1 | Isotropic chemical shifts of the *Pf* 26mer Box C/D RNA in the L7Ae-Box C/D RNA complex.**

|            | Isotropic chemical shifts, ppm |             |             |             |             |              |              |              |              |       |       |      |       |       |      |       |       |      |
|------------|--------------------------------|-------------|-------------|-------------|-------------|--------------|--------------|--------------|--------------|-------|-------|------|-------|-------|------|-------|-------|------|
|            | C1'                            | C2'         | C3'         | C4'         | C5'         | C2           | C4           | C5           | C6           | C8    | N1    | N2   | N3    | N4    | N6   | N7    | N9    | P    |
| <b>C2</b>  | -                              | -           | -           | -           | -           | 158.1        | -            | -            | -            |       | -     |      | -     | -     |      |       |       | -    |
| <b>U3</b>  | 94.8                           | 75.6        | 71.9        | 82.9        | 64.0        | 154.1        | 165.6        | 104.7        | 139.3        |       | 145.5 |      | 157.1 |       |      |       |       | -    |
| <b>G4</b>  | 90.1                           | 76.0        | 79.6        | 88.3        | 67.8        | 156.6        | 155.3        | 116.7        | 160.3        | 139.0 | 145.0 | 81.4 | -     |       |      | -     | 166.9 | -3.8 |
| <b>A5</b>  | 88.1                           | 78.4        | 80.0        | 83.4        | 70.3        | <i>156.0</i> | 150.9        | 118.8        | <i>156.6</i> | 139.8 | -     |      | -     |       | 81.4 | -     | 166.9 | -0.7 |
| <b>G6</b>  | 92.7                           | 75.8        | 77.3        | 83.4        | 70.9        | 158.2        | 152.2        | 119.5        | 157.9        | 139   | 148.9 | 75.8 | -     |       |      | -     | 171.1 | -3.8 |
| <b>C7</b>  | 93.9                           | 75.4        | 72.1        | 82.0        | 64.3        | 159.3        | 168.1        | 97.1         | 142.2        |       | 152.2 |      | 196.3 | 100.0 |      |       |       | -    |
| <b>U8</b>  | 93.7                           | 75.5        | 72.1        | 82.1        | 64.3        | 152.7        | 169.4        | 103.2        | 142.3        |       | 147.7 |      | 163.6 |       |      |       |       | -    |
| <b>C9</b>  | 93.2                           | 75.9        | 71.4        | <i>81.2</i> | 64.2        | 158.2        | <i>168.1</i> | 98.2         | 140.2        |       | 151.7 |      | 197.7 | 99.1  |      |       |       | -    |
| <b>G10</b> | 94.0                           | 75.7        | 71.5        | 81.8        | 64.4        | -            | 155.5        | -            | 161.7        | 136.3 | 146.2 | 75.5 | -     |       |      | -     | 171.3 | -    |
| <b>G14</b> | 92.6                           | 74.6        | -           | -           | -           | 155.9        | 151.9        | <i>119.2</i> | -            | 137.4 | 147.8 | 75.4 | -     |       |      | -     | 170   | -    |
| <b>A15</b> | 92.9                           | 75.6        | 72.3        | 81.8        | 64.1        | <i>153.0</i> | 148.6        | <i>120.6</i> | <i>157.6</i> | 139.5 | 222.1 |      | -     |       | -    | -     | 171.5 | -    |
| <b>G16</b> | 92.5                           | <i>76.0</i> | <i>72.0</i> | 81.7        | <i>64.4</i> | 157.0        | 151.6        | 119.0        | <i>160.9</i> | 135.6 | 147.6 | 74.6 | -     |       |      | -     | 170.9 | -    |
| <b>C17</b> | 93.6                           | 75.7        | 71.7        | 81.6        | 64.1        | 158.5        | 167.6        | 97.9         | 139.0        |       | 150.5 |      | 195.9 | 99.0  |      |       |       | -    |
| <b>A18</b> | 94.1                           | 76.6        | 72.5        | 81.6        | 64.6        | 156.0        | 150.6        | 121.6        | 157.7        | 138.6 | -     |      | -     |       | 80.7 | 230.9 | 173.2 | -4.2 |
| <b>A19</b> | 89.7                           | 72.2        | 78.5        | 85.1        | 67.4        | 154.5        | 150.5        | 121.8        | 156.4        | 145.8 | -     |      | -     |       | 76.3 | 228.2 | 164.7 | -1.8 |
| <b>U20</b> | 89.4                           | 75.4        | 80.5        | 84.2        | 69.5        | 154.2        | 167.9        | 105.7        | 146.8        |       | 147.4 |      | 158.5 |       |      |       |       | -5.3 |
| <b>G21</b> | 87.5                           | 77.5        | 80.0        | 87.5        | 68.3        | -            | 155.7        | 117.6        | 160.3        | 139.0 | 145.6 | 81.0 | -     |       |      | -     | 168.8 | -6.0 |
| <b>A22</b> | 92.4                           | 75.7        | 72.4        | 82.9        | 65.8        | 155.9        | 147.5        | 121.0        | 157.1        | 140.0 | -     |      | -     |       | 81.2 | -     | 170.2 | -0.1 |
| <b>U23</b> | 93.0                           | 74.6        | 72.0        | 82.3        | 63.1        | 151          | 167.6        | 103.8        | 140.0        |       | 144.7 |      | 155.7 |       |      |       |       | -4.2 |
| <b>G24</b> | 92.6                           | -           | -           | -           | -           | <i>157.4</i> | 152.8        | <i>118.1</i> | -            | 136.2 | -     | 76.5 | -     |       |      | -     | 172.4 | -    |

Assignments derived from only one source and/or from overlapped spectral regions are shown in italic.

**Supplementary Table 2 | List of distance restraints used in the structure calculation.**

| Atom 1                                                                       | Atom 2 | Atom 2 | Atom 2 | Restrained distance range (Å) | Distance in the ssNMR structure (Å) |
|------------------------------------------------------------------------------|--------|--------|--------|-------------------------------|-------------------------------------|
| <sup>13</sup> C, <sup>15</sup> N TEDOR- <sup>13</sup> C, <sup>13</sup> C PDS |        |        |        |                               |                                     |
| C17                                                                          | C1'    | G16    | C4     | 3.5-9.0                       | 5.8                                 |
| C17                                                                          | C1'    | G16    | C6     | 3.5-9.0                       | 6.7                                 |
| C17                                                                          | C1'    | G16    | C2     | 3.5-9.0                       | 5.8                                 |
| C17                                                                          | C1'    | G16    | C8     | 3.5-9.0                       | 6.7                                 |
| C17                                                                          | C1'    | G16    | C1'    | 3.5-9.0                       | 6.1                                 |
| C7                                                                           | C1'    | G6     | C4'    | 3.5-9.0                       | 7.2                                 |
| C7                                                                           | C1'    | G6     | C3'    | 3.5-9.0                       | 5.7                                 |
| C7                                                                           | C1'    | G6     | C5'    | 3.5-9.0                       | 8                                   |
| C7                                                                           | C1'    | G6     | C1'    | 3.5-9.0                       | 6.8                                 |
| C7                                                                           | C1'    | G6     | C8     | 3.5-9.0                       | 7.5                                 |
| C7                                                                           | C1'    | G6     | C4     | 3.5-9.0                       | 6.4                                 |
| G6                                                                           | C1'    | C7     | C2     | 3.5-9.0                       | 6.9                                 |
| G6                                                                           | C1'    | C7     | C4     | 3.5-9.0                       | 6.3                                 |
| G6                                                                           | C1'    | C7     | C5     | 3.5-9.0                       | 5.6                                 |
| G16                                                                          | C1'    | C17    | C4     | 3.5-9.0                       | 6.1                                 |
| C9                                                                           | C1'    | G10    | C4     | 3.5-9.0                       | 6.7                                 |
| C9                                                                           | C1'    | G10    | C6     | 3.5-9.0                       | 6.4                                 |
| U20                                                                          | C1'    | A19    | C3'    | 3.5-9.0                       | 6.5                                 |
| U20                                                                          | C1'    | A19    | C2'    | 3.5-9.0                       | 8.1                                 |
| U20                                                                          | C1'    | A19    | C4'    | 3.5-9.0                       | 6.4                                 |
| U20                                                                          | C1'    | A19    | C5'    | 3.5-9.0                       | 6.6                                 |
| A19                                                                          | C1'    | U20    | C2'    | 3.5-9.0                       | 7.9                                 |
| A19                                                                          | C1'    | U20    | C3'    | 3.5-9.0                       | 7.1                                 |
| A19                                                                          | C1'    | U20    | C4'    | 3.5-9.0                       | 6.5                                 |
| A19                                                                          | C1'    | U20    | C5'    | 3.5-9.0                       | 5.2                                 |
| A19                                                                          | C1'    | A18    | C1'    | 3.5-9.0                       | 8                                   |
| A19                                                                          | C1'    | A18    | C2'    | 3.5-9.0                       | 6.8                                 |
| A18                                                                          | C1'    | A19    | C4'    | 3.5-9.0                       | 6.9                                 |
| A18                                                                          | C1'    | A19    | C3'    | 3.5-9.0                       | 7.6                                 |
| A18                                                                          | C1'    | A19    | C5'    | 3.5-9.0                       | 5.4                                 |
| A18                                                                          | C1'    | A19    | C2     | 3.5-9.0                       | 5.5                                 |
| A18                                                                          | C1'    | A22    | C5'    | 3.5-9.0                       | 6                                   |
| A18                                                                          | C1'    | A22    | C4'    | 3.5-9.0                       | 5.7                                 |
| A18                                                                          | C1'    | A22    | C4     | 3.5-9.0                       | 8.5                                 |
| A5                                                                           | C1'    | A22    | C4     | 3.5-9.0                       | 5.4                                 |
| A5                                                                           | C1'    | A22    | C5     | 3.5-9.0                       | 5.7                                 |
| U23                                                                          | C1'    | A22    | C5'    | 3.5-9.0                       | 7.9                                 |
| U23                                                                          | C1'    | A22    | C4     | 3.5-9.0                       | 4.8                                 |
| U23                                                                          | C1'    | A22    | C2     | 3.5-9.0                       | 4.3                                 |
| U23                                                                          | C1'    | A22    | C6     | 3.5-9.0                       | 5.3                                 |
| U8                                                                           | C1'    | A15    | C4     | 3.5-9.0                       | 8.6                                 |
| A22                                                                          | C1'    | U23    | C2'    | 3.5-9.0                       | 7.1                                 |
| A22                                                                          | C1'    | U23    | C4     | 3.5-9.0                       | 6.4                                 |
| A22                                                                          | C1'    | U23    | C2     | 3.5-9.0                       | 6.5                                 |
| A22                                                                          | C1'    | A5     | C2'    | 3.5-9.0                       | 7.9                                 |

|                                        |     |     |     |         |     |
|----------------------------------------|-----|-----|-----|---------|-----|
| A22                                    | C1' | A5  | C3' | 3.5-9.0 | 8.5 |
| A22                                    | C1' | A18 | C2' | 3.5-9.0 | 5.8 |
| A22                                    | C1' | A19 | C2  | 3.5-9.0 | 7.4 |
| A22                                    | C1' | A5  | C4  | 3.5-9.0 | 4.9 |
| U3                                     | C1' | G4  | C5' | 3.5-9.0 | 5.5 |
| U3                                     | C1' | G4  | C3' | 3.5-9.0 | 6.9 |
| U3                                     | C1' | G4  | C1' | 3.5-9.0 | 5.6 |
| U20                                    | C1' | G21 | C4' | 3.5-9.0 | 6.7 |
| U20                                    | C1' | G21 | C5' | 3.5-9.0 | 5.9 |
| G21                                    | C1' | U20 | C5' | 3.5-9.0 | 6.2 |
| G21                                    | C1' | U20 | C4' | 3.5-9.0 | 6.4 |
| G21                                    | C1' | U20 | C1' | 3.5-9.0 | 8.3 |
| G24                                    | C1' | U23 | C2' | 3.5-9.0 | 4.8 |
| G24                                    | C1' | U23 | C2  | 3.5-9.0 | 5.8 |
| U23                                    | C1' | G24 | C4  | 3.5-9.0 | 5.8 |
| G4                                     | C1' | U3  | C3' | 3.5-9.0 | 5   |
| G4                                     | C1' | U3  | C4' | 3.5-9.0 | 6.5 |
| G4                                     | C1' | U3  | C5' | 3.5-9.0 | 7.4 |
| U8                                     | C1' | C7  | C2  | 3.5-9.0 | 5.8 |
| U8                                     | C1' | C9  | C2  | 3.5-9.0 | 5.9 |
| U3                                     | C1' | C2  | C2  | 3.5-9.0 | 5.8 |
| U23                                    | C1' | C7  | C2  | 3.5-9.0 | 9.7 |
| C7                                     | C1' | U23 | C5' | 3.5-9.0 | 5.7 |
| C9                                     | C1' | U8  | C2  | 3.5-9.0 | 5.6 |
| C9                                     | C1' | U8  | C4  | 3.5-9.0 | 6.9 |
| C9                                     | C1' | U8  | C5  | 3.5-9.0 | 7   |
| U8                                     | C1' | C9  | C5  | 3.5-9.0 | 4.9 |
| U8                                     | C1' | C9  | C6  | 3.5-9.0 | 4.7 |
| U8                                     | C1' | C7  | C5  | 3.5-9.0 | 7.2 |
| C2                                     | C1' | U3  | C4  | 3.5-9.0 | 5.7 |
| C2                                     | C1' | U3  | C2  | 3.5-9.0 | 6   |
| C2                                     | C1' | U3  | C5  | 3.5-9.0 | 5   |
| C17                                    | C1' | A18 | C2' | 3.5-9.0 | 6.4 |
| C17                                    | C1' | A18 | C3' | 3.5-9.0 | 6.4 |
| C17                                    | C1' | A18 | C4  | 3.5-9.0 | 6.7 |
| A18                                    | C1' | C17 | C2  | 3.5-9.0 | 4.2 |
| A18                                    | C1' | C17 | C4  | 3.5-9.0 | 5.2 |
| C17                                    | C1' | A18 | C6  | 3.5-9.0 | 8.4 |
| C17                                    | C1' | A18 | C2  | 3.5-9.0 | 8.3 |
| A19                                    | C1' | G21 | C1' | 3.5-9.0 | 5.5 |
| A19                                    | C1' | G21 | C3' | 3.5-9.0 | 7.4 |
| G6                                     | C1' | A5  | C1' | 3.5-9.0 | 3.9 |
| G6                                     | C1' | A5  | C2' | 3.5-9.0 | 5   |
| G6                                     | C1' | A5  | C3' | 3.5-9.0 | 5   |
| A5                                     | C1' | G6  | C2' | 3.5-9.0 | 5   |
| A18                                    | C1' | G21 | C3' | 3.5-9.0 | 8.7 |
| <sup>13</sup> C, <sup>31</sup> P TEDOR |     |     |     |         |     |
| A19                                    | C4' | U20 | P   | 2.0-5.0 | 3.7 |

|                                        |      |     |      |         |     |
|----------------------------------------|------|-----|------|---------|-----|
| A5                                     | C3'  | A5  | P    | 2.0-5.0 | 4.5 |
| A5                                     | C3'  | G6  | P    | 2.0-5.0 | 2.6 |
| A5                                     | C4'  | G6  | P    | 2.0-5.0 | 3.3 |
| A22                                    | C1'  | U23 | P    | 2.0-5.0 | 4.8 |
| A5                                     | C4'  | A5  | P    | 2.0-5.0 | 3.8 |
| A19                                    | C4'  | A19 | P    | 2.0-5.0 | 3.8 |
| A18                                    | C4'  | A19 | P    | 2.0-5.0 | 3.7 |
| A18                                    | C2'  | A19 | P    | 2.0-5.0 | 3.8 |
| A22                                    | C2'  | U23 | P    | 2.0-5.0 | 3.5 |
| G4                                     | C1'  | A5  | P    | 2.0-5.0 | 4.5 |
| G4                                     | C4'  | A5  | P    | 2.0-5.0 | 3.4 |
| G4                                     | C4'  | G4  | P    | 2.0-5.0 | 3.9 |
| G4                                     | C3'  | G4  | P    | 2.0-5.0 | 4.9 |
| G21                                    | C4'  | G21 | P    | 2.0-5.0 | 3.9 |
| G21                                    | C4'  | A22 | P    | 2.0-5.0 | 3.6 |
| U20                                    | C3'  | U20 | P    | 2.0-5.0 | 5.2 |
| <sup>13</sup> C, <sup>15</sup> N TEDOR |      |     |      |         |     |
| G4                                     | C1'  | A22 | N6   | 3.0-5.0 | 3.4 |
| G4                                     | C4'  | A22 | N6   | 3.0-5.0 | 4.5 |
| G21                                    | C1'  | A5  | N6   | 3.0-5.0 | 3.9 |
| G6                                     | C1'  | A5  | N9   | 3.0-5.0 | 4.6 |
| G24                                    | C1'  | U23 | N1   | 3.0-7.0 | 6.1 |
| G4                                     | C1'  | U3  | N1   | 3.0-7.0 | 5.4 |
| CHHC/NHHC                              |      |     |      |         |     |
| A18                                    | H2'  | A19 | H5'  | 2.0-4.0 | 3.5 |
| A19                                    | H5'  | U20 | H3'  | 2.0-5.0 | 4.9 |
| A22                                    | H1'  | A5  | H2   | 2.0-5.0 | 3.2 |
| A18                                    | H1'  | A22 | H4'  | 2.0-5.0 | 4.5 |
| A19                                    | H4'  | U20 | H2'  | 2.0-5.0 | 4.4 |
| A19                                    | H4'  | U20 | H3'  | 2.0-4.0 | 3.4 |
| A19                                    | H4'  | U20 | H5'  | 2.0-4.0 | 1.8 |
| A19                                    | H5'  | U20 | H2'  | 2.0-5.0 | 4.7 |
| A22                                    | H2'  | U23 | H5'' | 2.0-5.0 | 4.2 |
| G4                                     | H5'  | U3  | H2'  | 2.0-4.0 | 3.6 |
| G4                                     | H22  | G21 | H1'  | 2.0-5.0 | 5.1 |
| G21                                    | H22  | G4  | H1'  | 2.0-5.0 | 4.8 |
| A19                                    | H62  | A5  | H2'  | 2.0-4.0 | 3.6 |
| A19                                    | H62  | A5  | H3'  | 2.0-5.0 | 5.3 |
| A19                                    | H62  | A5  | H8   | 2.0-5.0 | 4.6 |
| A19                                    | H5'' | A5  | H61  | 2.0-4.0 | 4.9 |
| A19                                    | H4'  | A5  | H61  | 2.0-5.0 | 5.8 |
| A5                                     | H62  | A18 | H2'  | 2.0-5.0 | 6.3 |
| A5                                     | H62  | A19 | H2'  | 2.0-5.0 | 6.2 |
| A5                                     | H61  | G21 | H1'  | 2.0-4.0 | 2.8 |
| A22                                    | H61  | G4  | H1'  | 2.0-4.0 | 2.2 |
| G6                                     | H21  | A18 | H1'  | 2.0-4.0 | 3.8 |
| G6                                     | H22  | A22 | H4'  | 2.0-4.0 | 3.8 |
| G6                                     | H22  | A22 | H1'  | 2.0-4.0 | 4.8 |

|                  |     |     |     |         |     |
|------------------|-----|-----|-----|---------|-----|
| G21              | H21 | G4  | H3' | 2.0-5.0 | 5.8 |
| A22              | H61 | G4  | H3' | 2.0-5.0 | 6   |
| A22              | H62 | G4  | H2' | 2.0-5.0 | 5.1 |
| Intra-nucleotide |     |     |     |         |     |
| A19              | C4' | A19 | C8  | 2.0-6.0 | 4.7 |
| A19              | C4' | A19 | C4  | 2.0-6.0 | 4.1 |
| A19              | C5' | A19 | C8  | 2.0-6.0 | 5.5 |
| A19              | C5' | A19 | C4  | 2.0-6.0 | 4.3 |
| A19              | C5' | A19 | C1' | 2.0-4.0 | 3.4 |
| A19              | C5' | A19 | C2' | 2.0-4.0 | 3.3 |
| A19              | H1' | A19 | H3' | 2.0-5.0 | 3.8 |
| A19              | H1' | A19 | H4' | 2.0-5.0 | 3.4 |
| A19              | H1' | A19 | H5' | 2.0-5.0 | 4.7 |
| A19              | H1' | A19 | H8  | 2.0-4.0 | 2.5 |
| A19              | H2' | A19 | H4' | 2.0-5.0 | 3.8 |
| A19              | H2' | A19 | H5' | 2.0-5.0 | 3.1 |
| A19              | H3' | A19 | H5' | 2.0-5.0 | 2.2 |
| A18              | C5' | A18 | C4  | 2.0-6.0 | 5.3 |
| A18              | C4' | A18 | C4  | 2.0-6.0 | 4.6 |
| A18              | C5' | A18 | C1' | 2.0-4.0 | 3.5 |
| A18              | C5' | A18 | C2' | 2.0-4.0 | 3.7 |
| A18              | H1' | A18 | H3' | 2.0-5.0 | 3.9 |
| A18              | H1' | A18 | H4' | 2.0-5.0 | 3.6 |
| A18              | H2' | A18 | H4' | 2.0-5.0 | 3.9 |
| A18              | H2' | A18 | H5' | 2.0-5.0 | 4.5 |
| A18              | H3' | A18 | H5' | 2.0-5.0 | 2.3 |
| A18              | H4' | A18 | H8  | 2.0-5.0 | 4.1 |
| A5               | C5' | A5  | C4  | 2.0-6.0 | 5.5 |
| A5               | C5' | A5  | C1' | 2.0-4.0 | 3.4 |
| A5               | C5' | A5  | C2' | 2.0-4.0 | 3.3 |
| A5               | H1' | A5  | H3' | 2.0-5.0 | 3.8 |
| A5               | H2' | A5  | H4' | 2.0-5.0 | 3.8 |
| A5               | H2' | A5  | H5' | 2.0-5.0 | 4.3 |
| A5               | H2' | A5  | H8  | 2.0-5.0 | 2.4 |
| A5               | H3' | A5  | H5' | 2.0-5.0 | 3.5 |
| A22              | C5' | A22 | C4  | 2.0-6.0 | 5.5 |
| A22              | C3' | A22 | C4  | 2.0-6.0 | 4.2 |
| A22              | C5' | A22 | C1' | 2.0-4.0 | 3.6 |
| A22              | C5' | A22 | C2' | 2.0-4.0 | 3.7 |
| A22              | H4' | A22 | H8  | 2.0-5.0 | 4.3 |
| A22              | H2' | A22 | H5' | 2.0-5.0 | 5.4 |
| A22              | H3' | A22 | H5' | 2.0-5.0 | 3.7 |
| A15              | C5' | A15 | C1' | 2.0-4.0 | 3.6 |
| A15              | C5' | A15 | C2' | 2.0-4.0 | 3.7 |
| U3               | C5' | U3  | C1' | 2.0-4.0 | 3.6 |
| U3               | C5' | U3  | C2' | 2.0-4.0 | 3.7 |
| U3               | C5' | U3  | C2  | 2.0-6.0 | 5.6 |
| U8               | C5' | U8  | C1' | 2.0-4.0 | 3.6 |



|     |     |     |     |         |     |
|-----|-----|-----|-----|---------|-----|
| U8  | C5' | U8  | C2' | 2.0-4.0 | 3.7 |
| U8  | C5' | U8  | C2  | 2.0-6.0 | 5.6 |
| U20 | C5' | U20 | C1' | 2.0-4.0 | 3.3 |
| U20 | C5' | U20 | C2' | 2.0-4.0 | 3.2 |
| U20 | C5' | U20 | C2  | 2.0-6.0 | 5.4 |
| U20 | C5' | U20 | C6  | 2.0-6.0 | 3.8 |
| U23 | C5' | U23 | C1' | 2.0-4.0 | 3.6 |
| U23 | C5' | U23 | C2' | 2.0-4.0 | 3.7 |
| U23 | C5' | U23 | C2  | 2.0-6.0 | 5.6 |
| G4  | C5' | G4  | C1' | 2.0-4.0 | 3.4 |
| G4  | C5' | G4  | C2' | 2.0-4.0 | 3.3 |
| G6  | C5' | G6  | C1' | 2.0-4.0 | 3.5 |
| G6  | C5' | G6  | C2' | 2.0-4.0 | 3.7 |
| G10 | C5' | G10 | C1' | 2.0-4.0 | 3.5 |
| G10 | C5' | G10 | C2' | 2.0-4.0 | 3.7 |
| G21 | C5' | G21 | C1' | 2.0-4.0 | 3.5 |
| G21 | C5' | G21 | C2' | 2.0-4.0 | 3.4 |
| C7  | C5' | C7  | C1' | 2.0-4.0 | 3.6 |
| C7  | C5' | C7  | C2' | 2.0-4.0 | 3.7 |
| C9  | C5' | C9  | C1' | 2.0-4.0 | 3.6 |
| C9  | C5' | C9  | C2' | 2.0-4.0 | 3.7 |
| C17 | C5' | C17 | C1' | 2.0-4.0 | 3.6 |
| C17 | C5' | C17 | C2' | 2.0-4.0 | 3.7 |

---

## Supplementary references

1. Cherepanov, A. V., Glaubitz, C., & Schwalbe, H. High-resolution studies of uniformly C-13,N-15-labeled RNA by solid-state NMR spectroscopy. *Angew. Chem. Int. Ed.* **49**, 4747-4750 (2010).
2. Jaroniec, C. P., Filip, C., & Griffin, R. G. 3D TEDOR NMR experiments for the simultaneous measurement of multiple carbon-nitrogen distances in uniformly C-13, N-15-labeled solids. *J. Am. Chem. Soc.* **124**, 10728-10742 (2002).
3. Bennett, A. E., Ok, J. H., Griffin, R. G., & Vega, S. Chemical-shift correlation spectroscopy in rotating solids - Radio Frequency-driven Dipolar Recoupling and longitudinal exchange. *J. Chem. Phys.* **96**, 8624-8627 (1992).
4. Lange, A., Luca, S., & Baldus, M. Structural constraints from proton-mediated rare-spin correlation spectroscopy in rotating solids. *J. Am. Chem. Soc.* **124**, 9704-9705 (2002).
5. Lange, A., *et al.* A concept for rapid protein-structure determination by solid-state NMR spectroscopy. *Angew. Chem. Int. Ed.* **44**, 2089-2092 (2005).
6. Moore, T., Zhang, Y. M., Fenley, M. O., & Li, H. Molecular basis of box C/D RNA-protein interactions: Cocrystal structure of archaeal L7Ae and a box C/D RNA. *Structure* **12**, 807-818 (2004).
7. Xue, S., *et al.* Structural basis for substrate placement by an archaeal Box C/D ribonucleoprotein particle. *Mol. Cell* **39**, 939-949 (2010).
8. Huang, L. & Lilley, D. M. The molecular recognition of kink-turn structure by the L7Ae class of proteins. *RNA* **19**, 1703-1710 (2013).
9. Lin, J., *et al.* Structural basis for site-specific ribose methylation by box C/D RNA protein complexes. *Nature* **469**, 559-563 (2011).
